# Supplementary material for: Presence of an ultra-small microbiome in fermented cabbages
Source: PeerJ. 2023 Jul 17;11:e15680. doi: 10.7717/peerj.15680 (PMC10358336; doi:10.7717/peerj.15680)
Supplement: Table S1 [file peerj-11-15680-s005.xlsx]

## Sheet: Sheet1
Supplementary table 1. SMRT sequencing read quality indices.
Filter	Polymerase read bases	Polymerase reads	Polymerase read N50	Polymerase read length	Polymerase read quality
pre-filter	2078729223	150292	25222	13831	0.671
post-filter	2003149870	115727	25505	17309	0.832
